# Supplementary material
Source: publisher figshare collection journal article supplement (https://gsajournals.figshare.com/ndownloader/files/25417235)
Supplement: Supplementary file 1 [file 25417235]

Supplementary Material

**Evolution of Chi motifs in Proteobacteria**

Angélique Buton & Louis-Marie Bobay

Department of Biology, University of North Carolina Greensboro, 321 McIver Street, PO Box 26170, Greensboro, NC 27402, USA

**Table S3**. Number of species identified with Chi motifs 25 motifs searched).

| **Number of models taken into account** | **Number of species** | **Proteobacteria** | **%** | **Terrabacteria** | **%** |
| --- | --- | --- | --- | --- | --- |
| 1 | 244 | 177 | 72.5 | 67 | 27.5 |
| 2 | 191 | 148 | 77.5 | 43 | 22.5 |
| 3 | 101 | 85 | 87.6 | 12 | 12.4 |
| 4 | 63 | 56 | 88.9 | 7 | 11.1 |
| 5 | 33 | 31 | 93.9 | 2 | 6.1 |
| 6 | 0 | 0 | 0 | 0 | 0 |
